# Supplementary material
Source: PubMed Central journal article supplement (PMC5924733)

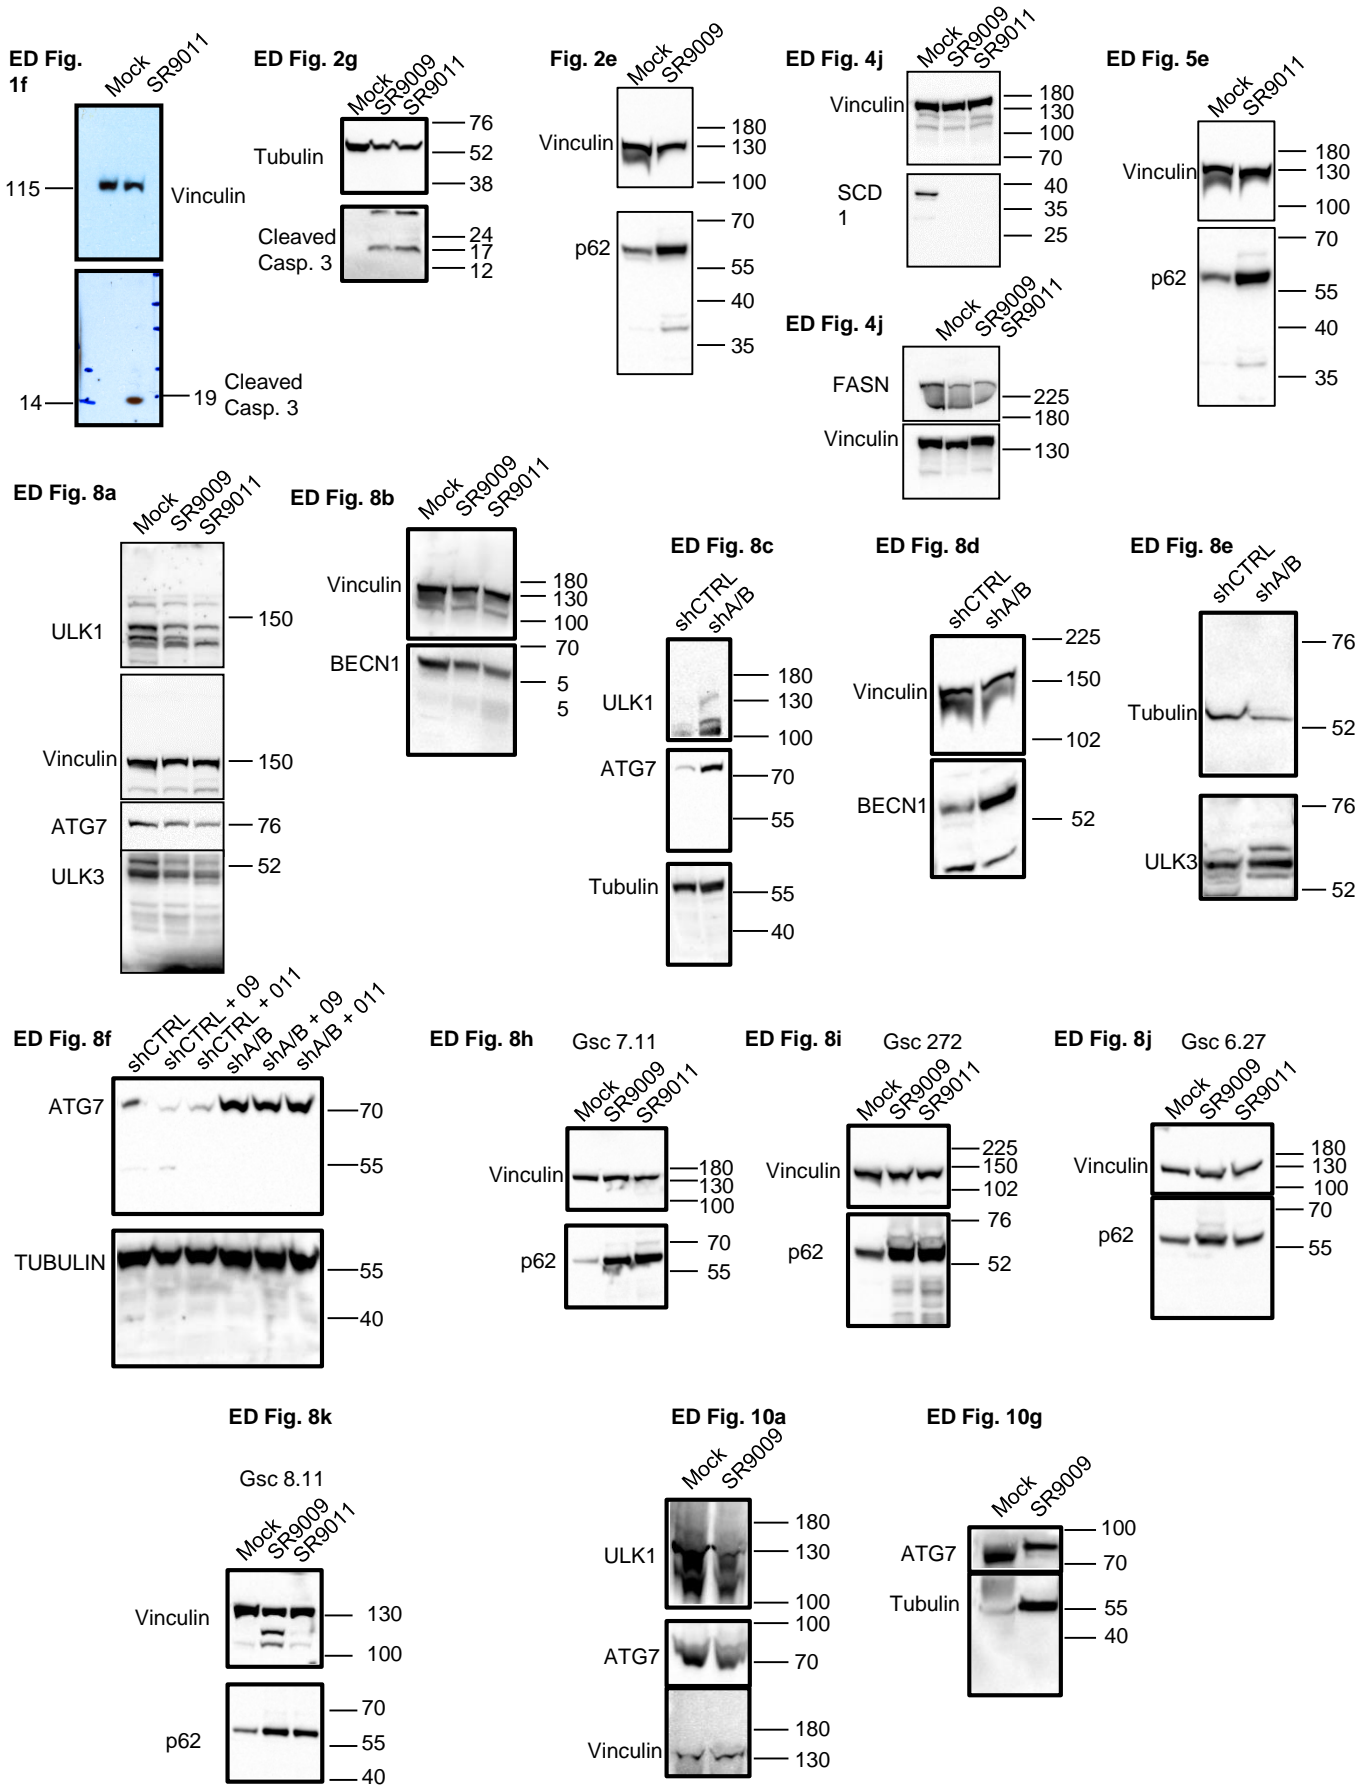

**Supplementary information 1.** Full scans of immunoblots used in figures.

Supplement: NIHMS922774-supplement-Supplementary_Information.pdf [file NIHMS922774-supplement-Supplementary_Information.pdf]
